# Supplementary material
Source: PubMed Central journal article supplement (PMC2709604)

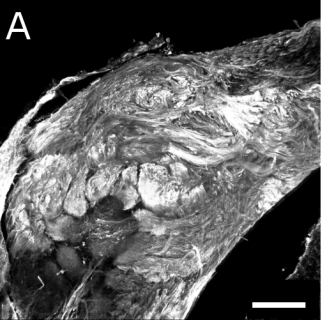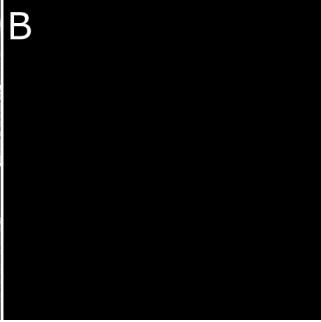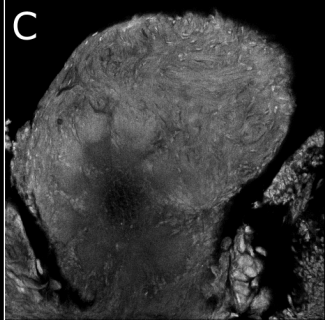

Supplement: NIHMS69363-supplement-01.pdf [file NIHMS69363-supplement-01.pdf]
